# Supplementary material for: Use of bone‐modifying agents and clinical outcomes in older adults with multiple myeloma
Source: PubMed Central journal article supplement (PMC6853813; doi:10.1002/cam4.2591), 2019-09-30
Supplement: CAM4-8-6945-s001.pdf [file CAM4-8-6945-s001.pdf]

## Data supplement

### Use of bone-modifying agents and clinical outcomes in older adults with multiple myeloma

**Authors:** Adam J Olszewski, MD <sup>1,2</sup>,  
Peter M Barth, MD <sup>1,2</sup>,  
John L Reagan, MD <sup>1,2</sup>

#### **Affiliations**

<sup>1</sup> Alpert Medical School of Brown University, Providence, RI

<sup>2</sup> Division of Hematology-Oncology, Rhode Island Hospital, Providence, RI

#### **Corresponding author:**

Adam J. Olszewski, M.D.

Assistant Professor of Medicine, Alpert Medical School of Brown University

Address: Comprehensive Cancer Center at Rhode Island Hospital  
593 Eddy St., Providence, RI, 02903

Phone: 401-444-5435

Fax: 401-444-4184

E-mail: adam\_olszewski@brown.edu

**Supplemental Figure S1.** Causal model for analyses, including treatment (the use of BMA), endpoints (SRE and overall survival), and confounders, as selected by clinical experts in myeloma.

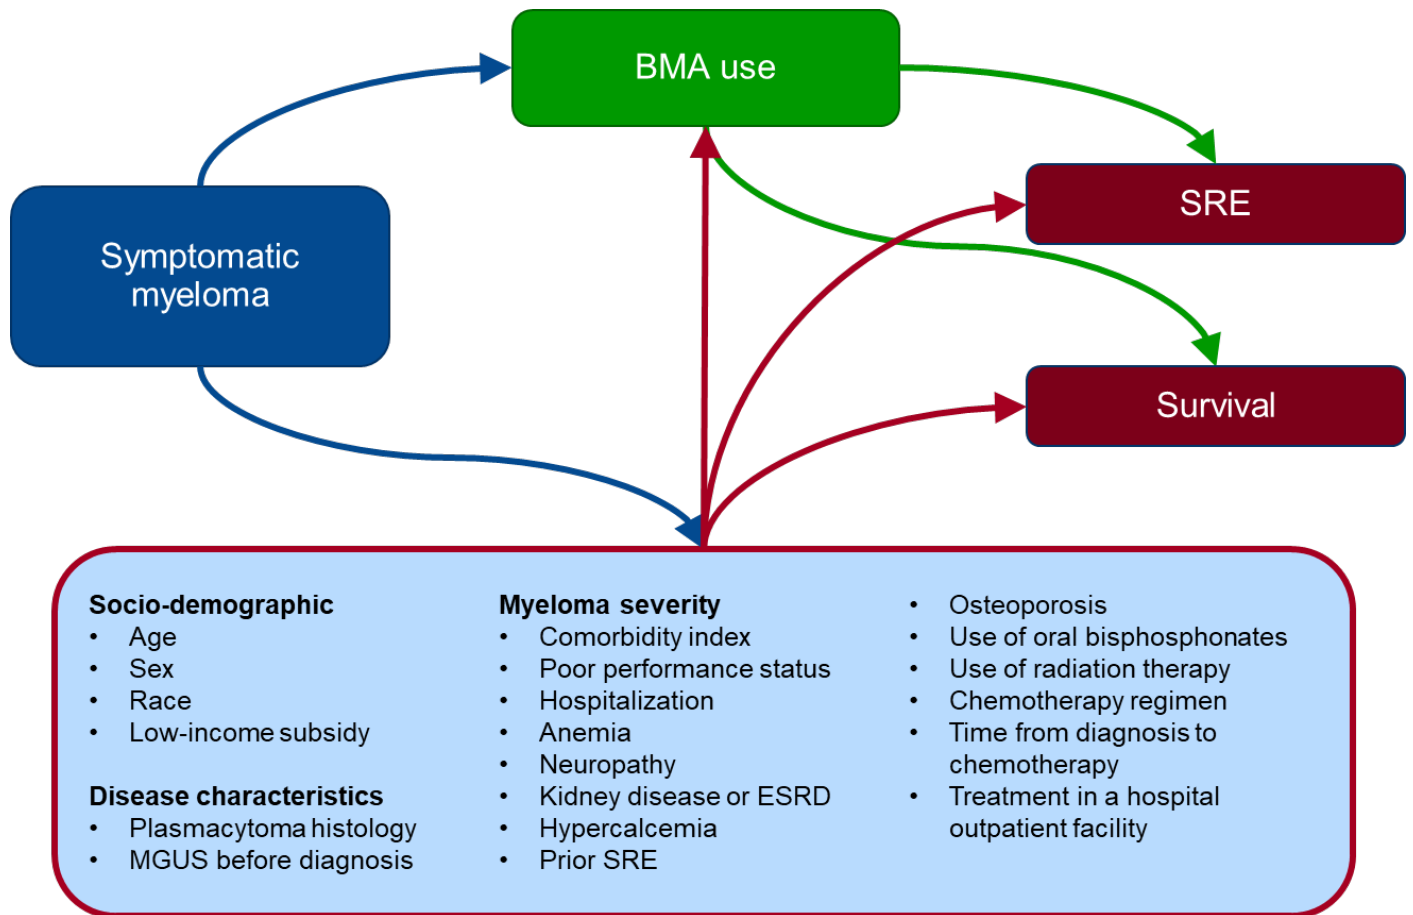

**Supplemental Table S1.** Definition of claims-based covariates in the study.

| Variable                            | Timeframe                                    | Definition                                                                                                                                                                                                                                                                                                                                                                                                                                                  |
|-------------------------------------|----------------------------------------------|-------------------------------------------------------------------------------------------------------------------------------------------------------------------------------------------------------------------------------------------------------------------------------------------------------------------------------------------------------------------------------------------------------------------------------------------------------------|
| Low-income subsidy                  | At diagnosis                                 | <ul style="list-style-type: none"> <li>As recorded in Part D denominator file for the month of myeloma diagnosis</li> </ul>                                                                                                                                                                                                                                                                                                                                 |
| MGUS                                | 12 mo. before diagnosis                      | <ul style="list-style-type: none"> <li>ICD-9 code 273.*</li> </ul>                                                                                                                                                                                                                                                                                                                                                                                          |
| Comorbidity index                   | 12 mo. before chemotherapy                   | <ul style="list-style-type: none"> <li>NCI modification of Charlson Comorbidity Index<sup>1</sup></li> </ul>                                                                                                                                                                                                                                                                                                                                                |
| Performance status                  | 12 mo. before chemotherapy                   | <ul style="list-style-type: none"> <li>Davidoff Disability Indicator<sup>2,3</sup></li> </ul>                                                                                                                                                                                                                                                                                                                                                               |
| Hospitalization                     | 12 mo. before chemotherapy                   | <ul style="list-style-type: none"> <li>Any short- or long-term inpatient admission claim</li> </ul>                                                                                                                                                                                                                                                                                                                                                         |
| Anemia                              | 12 mo. before chemotherapy                   | <ul style="list-style-type: none"> <li>ICD-9 code for anemia<sup>a</sup></li> <li>Any red cell transfusion</li> <li>Any use of erythropoiesis-stimulating agent</li> <li>Any use of intravenous iron</li> </ul>                                                                                                                                                                                                                                             |
| Neuropathy                          | 12 mo. before chemotherapy                   | <ul style="list-style-type: none"> <li>ICD-9 code for neuropathy or myopathy<sup>a</sup></li> </ul>                                                                                                                                                                                                                                                                                                                                                         |
| Kidney disease                      | 12 mo. before chemotherapy                   | <ul style="list-style-type: none"> <li>Record of kidney disease on comorbidity Index<sup>1</sup></li> <li>Visit with a nephrologist (according to Medicare provider/supplier specialty codes)</li> </ul>                                                                                                                                                                                                                                                    |
| Hypercalcemia                       | 12 mo. before chemotherapy                   | <ul style="list-style-type: none"> <li>ICD-9 code for hypercalcemia (275.42)<sup>a</sup></li> </ul>                                                                                                                                                                                                                                                                                                                                                         |
| Prior SRE                           | 12 mo. before chemotherapy                   | <ul style="list-style-type: none"> <li>Fracture of vertebrae, hip, pelvis, or femur</li> <li>Any kyphoplasty or vertebroplasty</li> <li>Any spinal cord compression</li> <li>Ascertained according to previously published algorithms incorporating ICD-9 and HCPCS codes<sup>4,5</sup></li> </ul>                                                                                                                                                          |
| Osteoporosis                        | 12 mo. before chemotherapy                   | <ul style="list-style-type: none"> <li>ICD-9 code 733.0* or 805.*</li> </ul>                                                                                                                                                                                                                                                                                                                                                                                |
| Use of oral bisphosphonates         | 12 mo. before chemotherapy                   | <ul style="list-style-type: none"> <li>Part D (outpatient prescription) claims for alendronate, ibandronate, or risendronate</li> </ul>                                                                                                                                                                                                                                                                                                                     |
| Use of radiation therapy            | 12 mo. before chemotherapy                   | <ul style="list-style-type: none"> <li>ICD-9 or HCPCS code for radiation therapy administration in combination with a diagnostic ICD-9 code for myeloma or plasmacytoma (203.*)</li> </ul>                                                                                                                                                                                                                                                                  |
| Chemotherapy regimen                | 60 days from the start of chemotherapy       | <ul style="list-style-type: none"> <li>Based on identification of specific anti-neoplastic drugs in HCPCS codes, Part D claims (for orally administered agents), NDC codes (in Durable Medical Equipment files), or ICD-9 codes for inpatient chemotherapy administration.</li> <li>Key agents identified included: bortezomib, lenalidomide, thalidomide, dexamethasone, prednisone, melphalan, cyclophosphamide, vincristine, and doxorubicin.</li> </ul> |
| Time from diagnosis to chemotherapy | Measured in mo.                              | <ul style="list-style-type: none"> <li>Interval between diagnosis of myeloma (from the SEER registry) and first date of chemotherapy administration</li> </ul>                                                                                                                                                                                                                                                                                              |
| Treatment setting                   | First 60 days of chemotherapy                | <ul style="list-style-type: none"> <li>Based on the indicator of “place of service” in the Carrier or Hospital Outpatient files using all claims for chemotherapy administration.</li> <li>Outpatient prescriptions were treated as office-based setting.</li> <li>About 73% of patients had exclusively office-based claims.</li> <li>Hospital outpatient setting was empirically assigned if &gt;75% of claims were recorded in that setting.</li> </ul>  |
| BMA administration                  | First 90 days from the start of chemotherapy | <ul style="list-style-type: none"> <li>HCPCS codes J2340, C9411 (pamidronate), J3847, J3488, J3489, Q2051 (zoledronate), and J0897 (denosumab)</li> </ul>                                                                                                                                                                                                                                                                                                   |
| Osteonecrosis of the jaw            | Any time after the 90 days from chemotherapy | <ul style="list-style-type: none"> <li>Any occurrence of ICD-9 codes 733.45, 526.4, 526.89, 526.9</li> </ul>                                                                                                                                                                                                                                                                                                                                                |

BMA: bone-modifying agents; HCPCS: Healthcare Common Procedure Coding System; ICD-9: International Classification of Diseases, 9<sup>th</sup> revision; NDC: National Drug Code; SEER: Surveillance, Epidemiology, and End Results

<sup>a</sup> to improve specificity, diagnostic codes had to be recorded at least once in inpatient claims, or at least twice, at least 30 days apart, in outpatient claims

**Supplemental Figure S2.** Evaluation of survival in myeloma using variables derived from cancer registry and Medicare claims.

The prognostic index was derived from a Cox model including all listed variables. Based on the model, patients were grouped into 4 quartiles according to the calculated risk. The resulting risk quartiles were evaluated in a univariate model. The Harrel's *c* concordance measure of this model was 0.65.

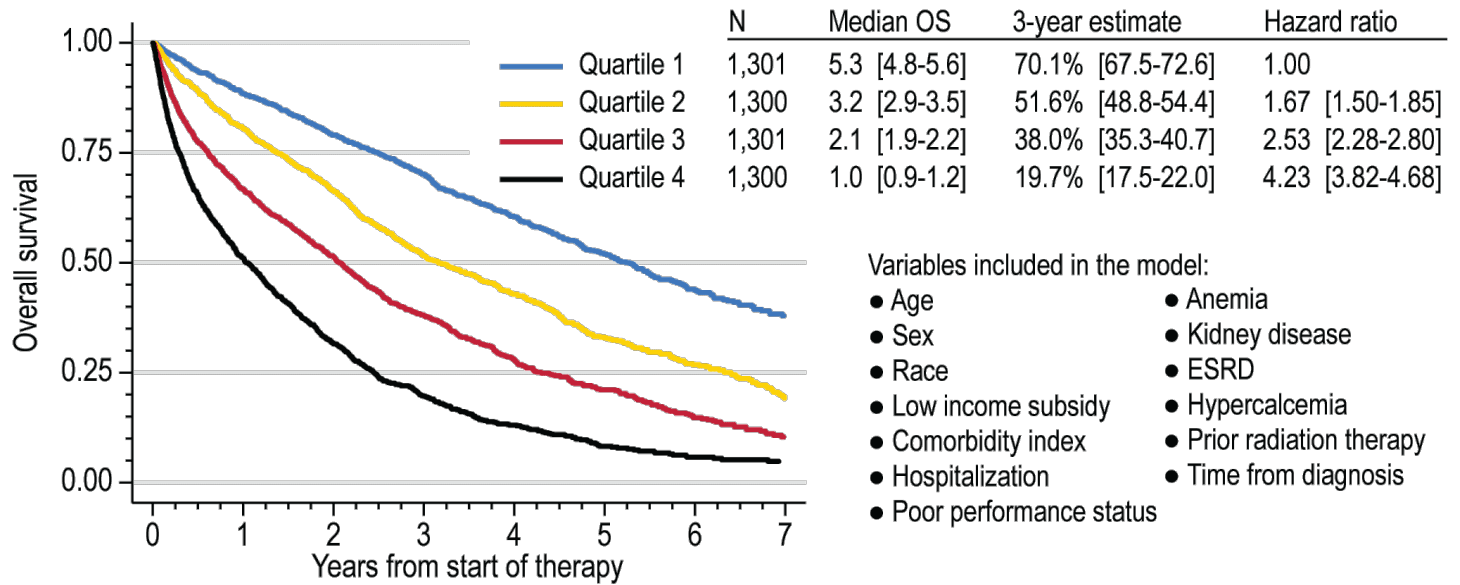

**Supplemental Figure S3.** Overall survival (A) and cumulative incidence function (B) of skeletal-related events (SRE) in the entire analytic cohort, stratified by receipt of bortezomib or IMiDs as part of first-line regimen.

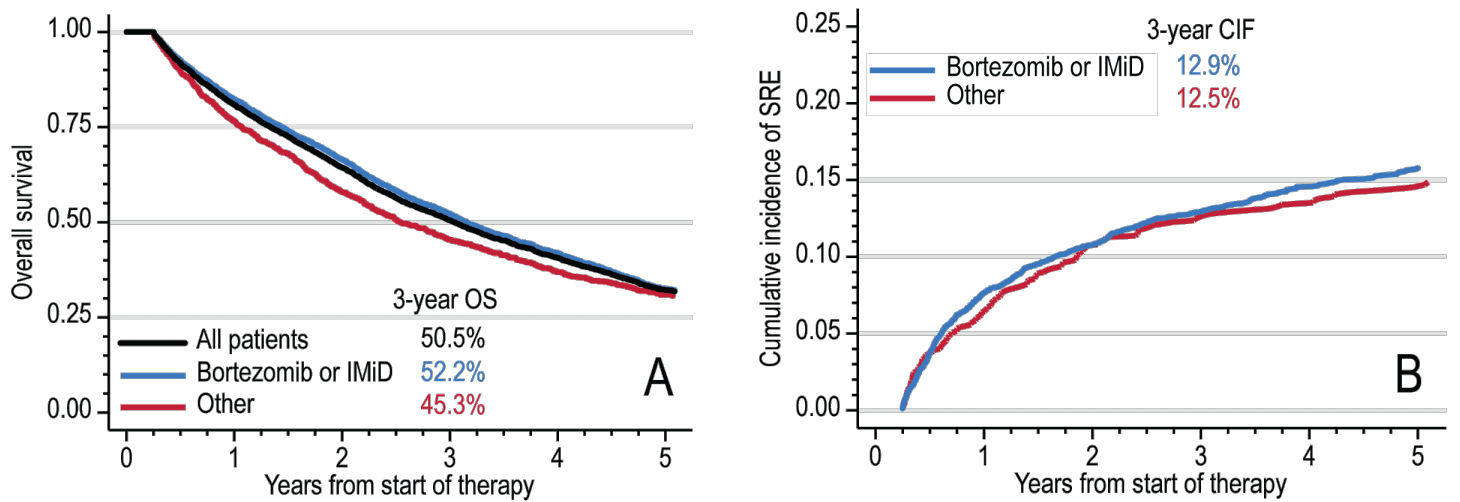

**Supplemental Figure S4.** Propensity score analysis in the subcohort of patients who received bortezomib and/or an IMiD as part of their first-line regimen for myeloma.

(A) balance of confounders, as determined by standardized differences of means (SDM); SDM of <0.1 conventionally indicates sufficient balance; (B) cumulative incidence function (CIF) of skeletal-related events (SRE) in the propensity score-matched cohort (N=2,316); outcome model reports subhazard ratio (SHR) with 95% confidence interval (CI); (C) overall survival in the propensity score-matched cohort (N=2,316); outcome model reports hazard ratio (HR) with 95%CI.

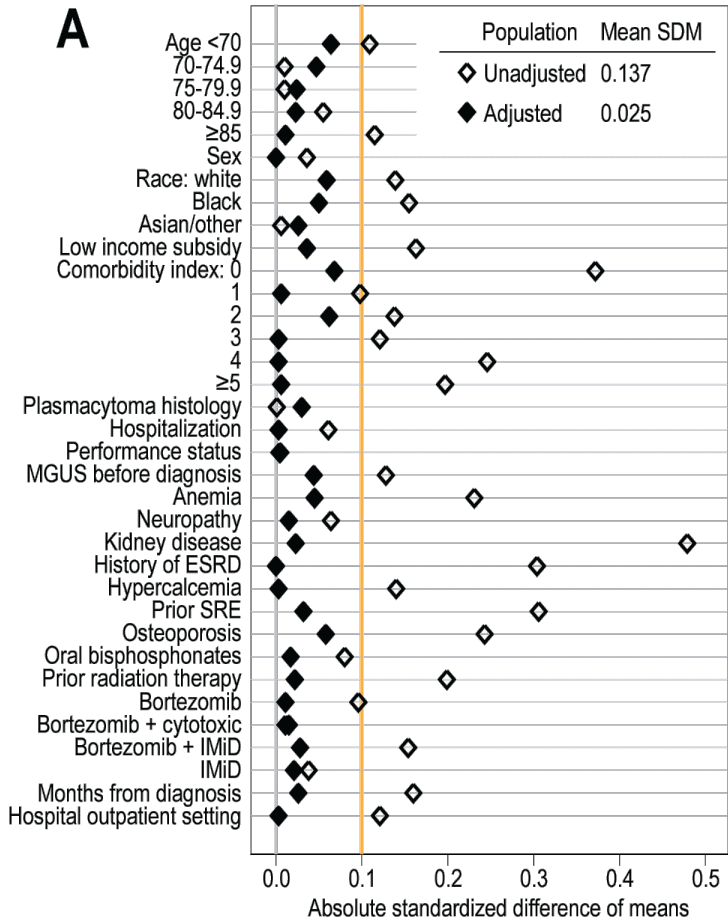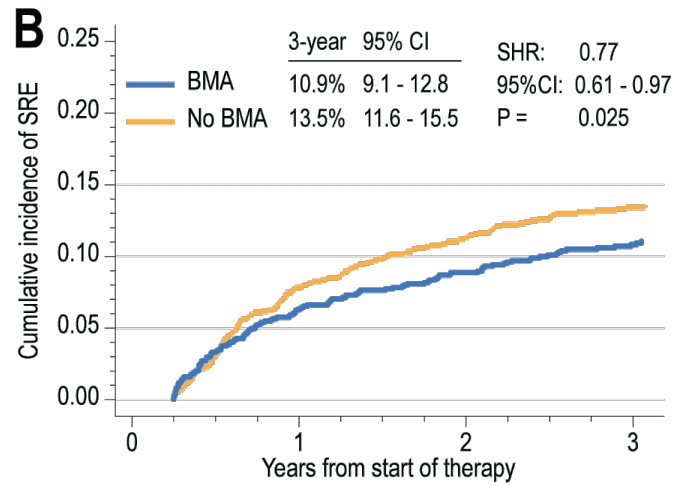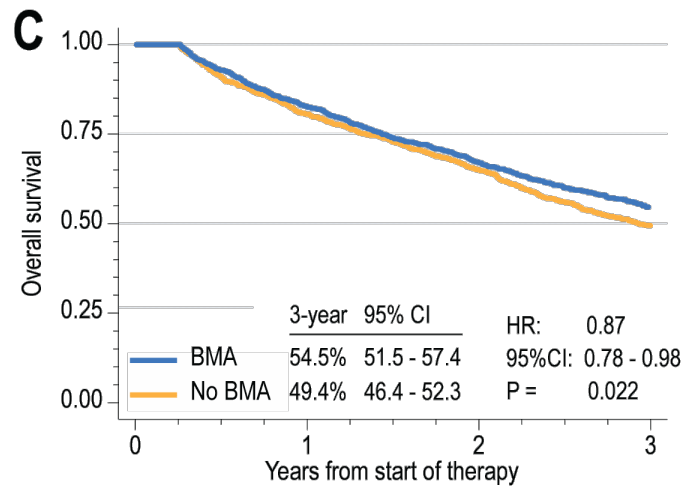

**Supplemental Figure S5. Sensitivity analyses.**

(A) estimate of subhazard ratio for the CIF of SRE, with 95% confidence interval (CI), after propensity score (PS) matching was conducted in subcohorts defined by progressively narrower ranges of allowed PS values; the estimate at 0% trim reproduces the main study result; as more % is trimmed, the number of matched pairs decreases, resulting in wider CI and increased mean bias; there was no evidence of a significant change in the estimate with higher trims; (B) OS estimate after analogous procedure; (C) a matrix showing estimates of subhazard ratio for the CIF of SRE, adjusted for an additional, unobserved, binary confounder, according to Lin et al.;<sup>6</sup> the confounder is simulated to have a hazard ratio of 2.0 ( $e^\gamma$ ); if  $\beta^*$  is the baseline regression coefficient in the absence of the confounder, and  $P_0$  and  $P_1$  denote prevalence of the confounder among treated and untreated, then the adjusted coefficient ( $\beta$ ) is given by the equation:  $\beta \approx \beta^* - \log \frac{e^\gamma * P_1 + (1 - P_1)}{e^\gamma * P_0 + (1 - P_0)}$ ; the 95% CI around the adjusted coefficient was calculated using the delta method; blue squares indicate statistically significant results; panels (E), (F), (G), and (H) show analogous analyses conducted in the subpopulation of patients receiving a novel agent (bortezomib or IMiD) as part of their first-line regimen.

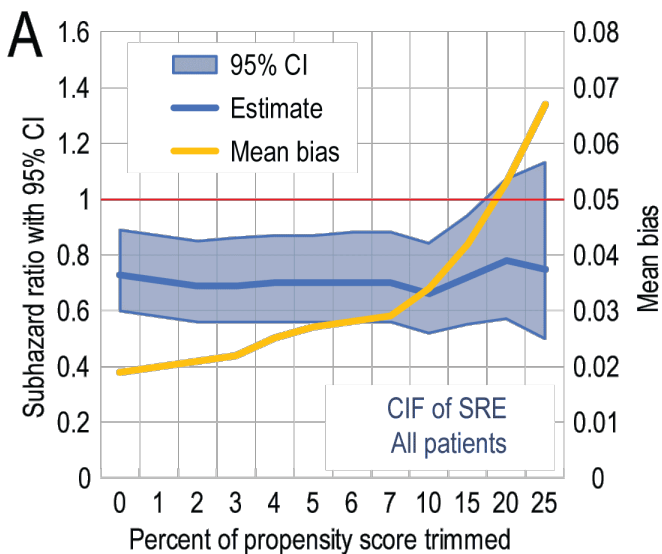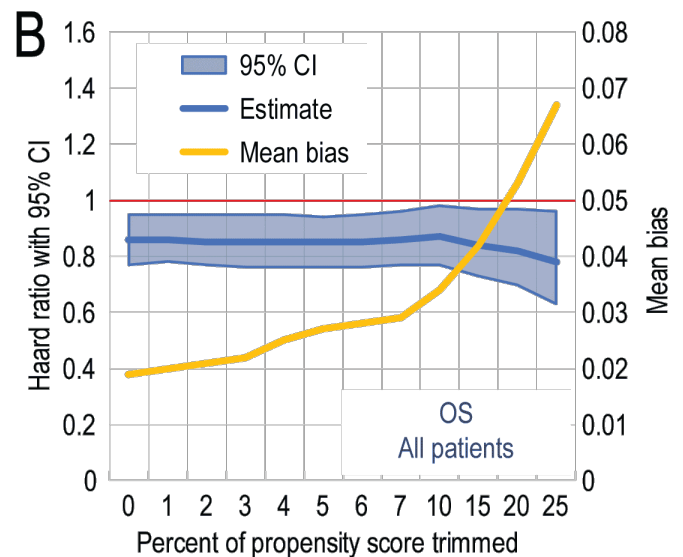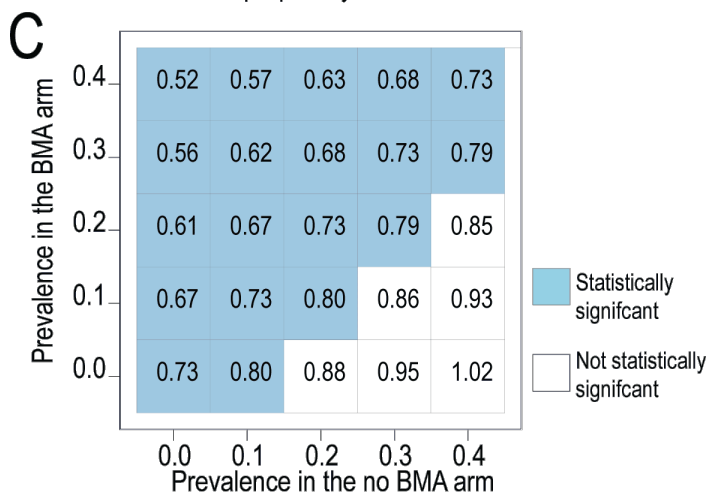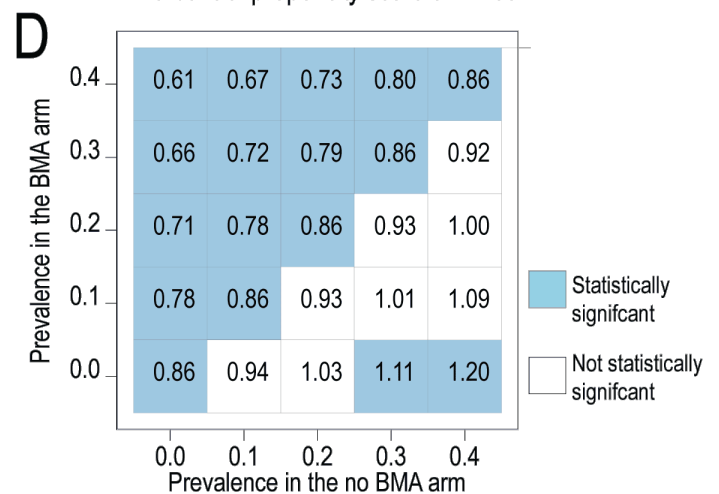

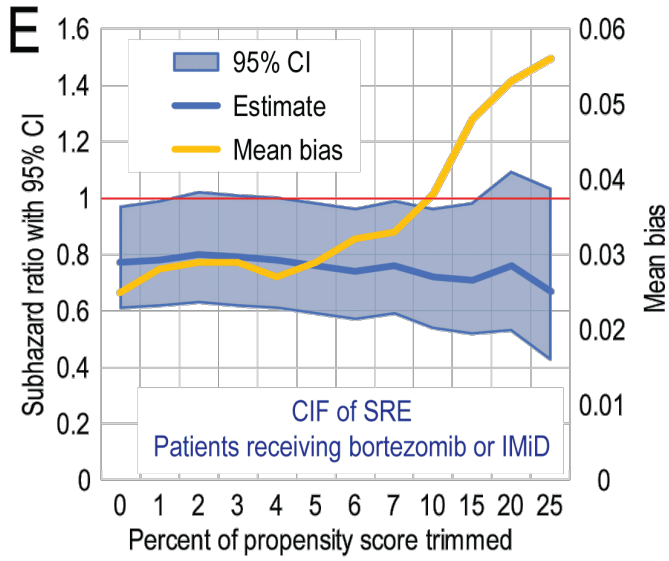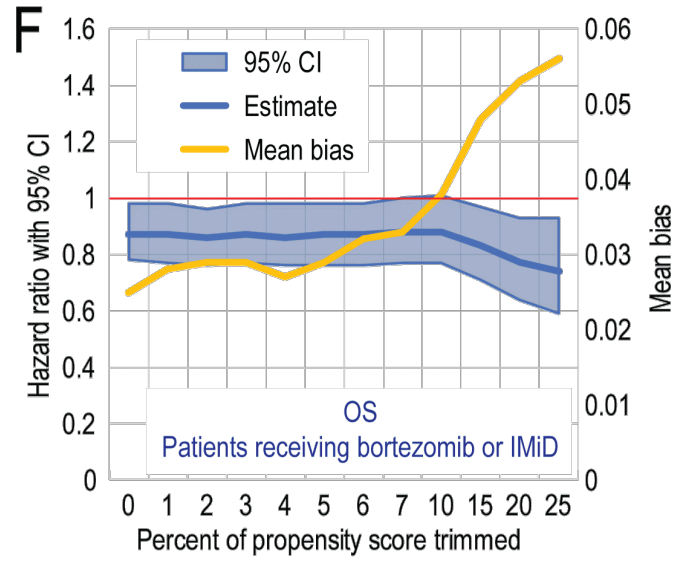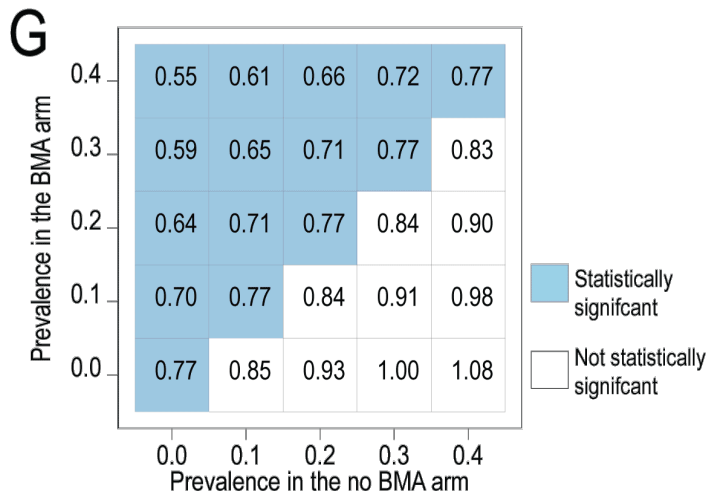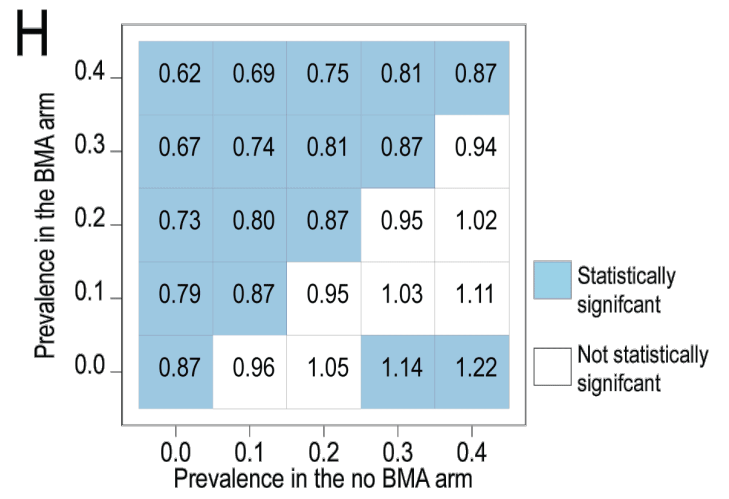

**Supplemental Table S2.** Sensitivity analysis for the time window of BMA administration from the start of first-line therapy. The results for all endpoints were consistent when the window was varied between 60 and 120 days from the start of chemotherapy.

| Window for BMA receipt<br>(days from start of first-line chemotherapy) | % of BMA recipients | Risk of SRE |           | OS   |           | Risk of ONJ |            |
|------------------------------------------------------------------------|---------------------|-------------|-----------|------|-----------|-------------|------------|
|                                                                        |                     | SHR         | 95%CI     | HR   | 95%CI     | SHR         | 95%CI      |
| <b>All patients</b>                                                    |                     |             |           |      |           |             |            |
| 60                                                                     | 72%                 | 0.75        | 0.61-0.91 | 0.85 | 0.77-0.94 | 3.09        | 1.77-5.41  |
| 90 (main analysis)                                                     | 80%                 | 0.73        | 0.60-0.89 | 0.86 | 0.77-0.95 | 4.13        | 2.19-7.79  |
| 120                                                                    | 89%                 | 0.69        | 0.55-0.86 | 0.87 | 0.79-0.97 | 4.92        | 2.29-10.57 |
| <b>Patients receiving IMiDs and/or bortezomib</b>                      |                     |             |           |      |           |             |            |
| 60                                                                     | 72%                 | 0.82        | 0.66-1.03 | 0.84 | 0.75-0.94 | 2.58        | 1.44-4.63  |
| 90 (main analysis)                                                     | 80%                 | 0.77        | 0.61-0.97 | 0.87 | 0.78-0.98 | 3.74        | 1.88-7.44  |
| 120                                                                    | 89%                 | 0.68        | 0.53-0.88 | 0.84 | 0.75-0.95 | 4.19        | 1.83-9.62  |



## References

1. Klabunde CN, Potosky AL, Legler JM, et al: Development of a comorbidity index using physician claims data. *J Clin Epidemiol* 53:1258-1267, 2000
2. Davidoff AJ, Gardner LD, Zuckerman IH, et al: Validation of disability status, a claims-based measure of functional status for cancer treatment and outcomes studies. *Med Care* 52:500-510, 2014
3. Davidoff AJ, Zuckerman IH, Pandya N, et al: A novel approach to improve health status measurement in observational claims-based studies of cancer treatment and outcomes. *J Geriatr Oncol* 4:157-165, 2013
4. Taylor AJ, Gary LC, Arora T, et al: Clinical and demographic factors associated with fractures among older Americans. *Osteoporos Int* 22:1263-1274, 2011
5. Olszewski AJ, Gutman R, Eaton CB: Increased risk of axial fractures in patients with untreated chronic lymphocytic leukemia: a population-based analysis. *Haematologica* 101:e488-e491, 2016
6. Lin DY, Psaty BM, Kronmal RA: Assessing the sensitivity of regression results to unmeasured confounders in observational studies. *Biometrics* 54:948-963, 1998
